# Supplementary material for: Utility of macrophages in an antitumor strategy based on the vectorization of iron oxide nanoparticles
Source: Royal Society of Chemistry journal article supplement (doi:10.1039/c8nr03364a), 2019-01-01
Supplement: c8nr03364a1.pdf [file c8nr03364a1.pdf]

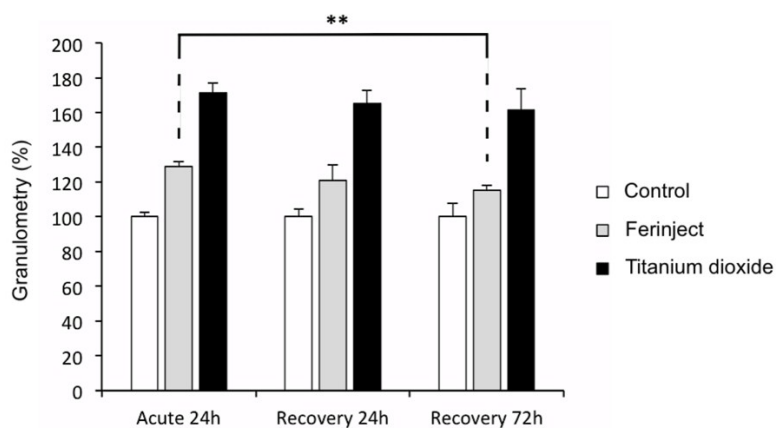

Supplementary data 1 - Assessment of NP-uptake by cell granulometry. NP incubation: 24h. Ferinject = 1mg/mL and NP-TiO<sub>2</sub> = 50µg/mL. Statistical confidence (Student T-test) is indicated as follows \*p ≤ 0,01.

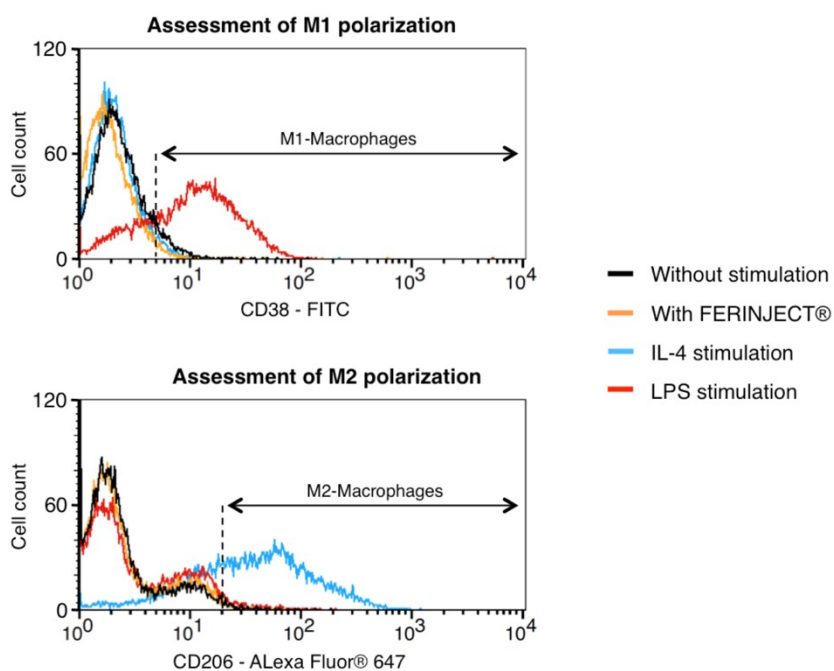

Supplementary data 2 - Macrophage polarization in the presence or absence of Ferinject. Positive M1 control: incubation with LPS (100ng/mL). Positive M2 control: incubation with IL-4 (20ng/mL).
